# Supplementary material
Source: PubMed Central journal article supplement (PMC6440432)
Supplement: jamaophthalmol-137-146-s001.pdf [file jamaophthalmol-137-146-s001.pdf]

## Supplementary Online Content

Ehrlich JR, Stagg BC, Andrews C, Kumagai A, Musch DC. Vision impairment and receipt of eye care among older adults in low- and middle-income countries. *JAMA Ophthalmol*. Published online November 21, 2018. doi:10.1001/jamaophthalmol.2018.5449

**eTable 1.** Odds of distance vision impairment in low- and middle-income countries

**eTable 2.** Odds of near vision impairment in low- and middle-income countries

**eTable 3.** Odds of having had a recent eye exam in low- and middle-income countries

This supplementary material has been provided by the authors to give readers additional information about their work.

**eTable 1.** Odds of distance vision impairment in low- and middle-income countries

|                                 | China                  |                                | Ghana               |                     | India               |                     | Mexico              |                     | Russia              |                     | South Africa        |                     |
|---------------------------------|------------------------|--------------------------------|---------------------|---------------------|---------------------|---------------------|---------------------|---------------------|---------------------|---------------------|---------------------|---------------------|
|                                 | UOR,<br>(95% CI)       | AOR <sup>a</sup> ,<br>(95% CI) | UOR,<br>(95% CI)    | AOR,<br>(95% CI)    | UOR,<br>(95% CI)    | AOR,<br>(95% CI)    | UOR,<br>(95% CI)    | AOR,<br>(95% CI)    | UOR,<br>(95% CI)    | AOR,<br>(95% CI)    | UOR,<br>(95% CI)    | AOR,<br>(95% CI)    |
| <b>Age</b>                      |                        |                                |                     |                     |                     |                     |                     |                     |                     |                     |                     |                     |
| 50-59                           | reference              |                                | reference           |                     | reference           |                     | reference           |                     | reference           |                     | reference           |                     |
| 60-69                           | 1.97<br>(1.61-2.41)    |                                | 1.70<br>(1.27-2.28) |                     | 2.15<br>(1.68-2.76) |                     | 1.23<br>(0.66-2.30) |                     | 1.29<br>(0.79-2.12) |                     | 1.49<br>(1.02-2.18) |                     |
| 70-79                           | 5.90<br>(4.87-7.16)    |                                | 2.32<br>(1.72-3.12) |                     | 3.64<br>(2.73-4.85) |                     | 2.17<br>(1.17-4.01) |                     | 2.02<br>(1.25-3.25) |                     | 1.95<br>(1.28-2.96) |                     |
| 80+                             | 16.68<br>(13.03-21.36) |                                | 3.74<br>(2.67-5.24) |                     | 5.89<br>(4.00-8.67) |                     | 3.72<br>(1.94-7.14) |                     | 3.57<br>(1.85-6.87) |                     | 1.76<br>(1.00-3.08) |                     |
| <b>Sex</b>                      |                        |                                |                     |                     |                     |                     |                     |                     |                     |                     |                     |                     |
| Male                            | reference              |                                | reference           |                     | reference           |                     | reference           |                     | reference           |                     | reference           |                     |
| Female                          | 1.65<br>(1.45-1.89)    | 1.30<br>(1.12-1.50)            | 1.43<br>(1.16-1.76) | 1.21<br>(0.98-1.50) | 1.39<br>(1.13-1.72) | 1.17<br>(0.94-1.45) | 0.90<br>(0.65-1.25) | 0.90<br>(0.64-1.26) | 1.21<br>(0.90-1.63) | 1.07<br>(0.79-1.46) | 1.41<br>(1.05-1.91) | 1.41<br>(1.01-1.97) |
| <b>Education</b>                |                        |                                |                     |                     |                     |                     |                     |                     |                     |                     |                     |                     |
| None                            | reference              |                                | reference           |                     | reference           |                     | reference           |                     | reference           |                     | reference           |                     |
| Primary School not completed    | 0.41<br>(0.34-0.50)    |                                | 0.45<br>(0.30-0.69) |                     | 0.77<br>(0.56-1.05) |                     | 0.90<br>(0.58-1.40) |                     | 0.72<br>(0.15-3.42) |                     | 0.81<br>(0.53-1.24) |                     |
| Primary School                  | 0.29<br>(0.23-0.35)    |                                | 0.59<br>(0.42-0.83) |                     | 0.76<br>(0.54-1.07) |                     | 0.80<br>(0.46-1.38) |                     | 1.78<br>(0.39-8.10) |                     | 1.02<br>(0.65-1.61) |                     |
| Secondary/ High School          | 0.16<br>(0.13-0.20)    |                                | 0.28<br>(0.20-0.39) |                     | 0.44<br>(0.30-0.65) |                     | 0.28<br>(0.13-0.58) |                     | 0.65<br>(0.16-2.65) |                     | 0.60<br>(0.36-1.00) |                     |
| University or Post-Graduate     | 0.28<br>(0.18-0.44)    |                                | 0.38<br>(0.20-0.74) |                     | 0.19<br>(0.09-0.40) |                     | 0.65<br>(0.27-1.57) |                     | 0.36<br>(0.08-1.61) |                     | 0.33<br>(0.14-0.79) |                     |
| <b>Wealth Index<sup>b</sup></b> |                        |                                |                     |                     |                     |                     |                     |                     |                     |                     |                     |                     |
| Lowest quintile                 | 3.37<br>(2.68-4.24)    |                                | 2.40<br>(1.69-3.41) |                     | 2.06<br>(1.51-2.83) |                     | 2.05<br>(1.11-3.78) |                     | 2.63<br>(1.47-4.73) |                     | 1.83<br>(1.08-3.10) |                     |
| 2                               | 1.81<br>(1.42-2.32)    |                                | 1.99<br>(1.37-2.91) |                     | 1.39<br>(1.02-1.90) |                     | 2.17<br>(1.17-4.02) |                     | 3.24<br>(1.83-5.73) |                     | 1.16<br>(0.68-2.00) |                     |
| 3                               | 1.51<br>(1.17-1.93)    |                                | 1.70<br>(1.18-2.46) |                     | 1.56<br>(1.11-2.21) |                     | 1.73<br>(0.90-3.31) |                     | 4.62<br>(2.58-8.26) |                     | 0.90<br>(0.52-1.53) |                     |
| 4                               | 0.93<br>(0.71-1.21)    |                                | 1.21<br>(0.83-1.78) |                     | 1.16<br>(0.86-1.56) |                     | 2.02<br>(1.05-3.88) |                     | 1.80<br>(0.97-3.35) |                     | 1.41<br>(0.83-2.40) |                     |
| Highest quintile                | reference              |                                | reference           |                     | reference           |                     | reference           |                     | reference           |                     | reference           |                     |

|                                  |                     |                     |                     |                     |                     |                     |                     |                     |                      |                      |                     |                     |
|----------------------------------|---------------------|---------------------|---------------------|---------------------|---------------------|---------------------|---------------------|---------------------|----------------------|----------------------|---------------------|---------------------|
| <b>Food Insecurity</b>           |                     |                     |                     |                     |                     |                     |                     |                     |                      |                      |                     |                     |
| Ever                             | 2.31<br>(1.22-4.37) | 1.75<br>(0.95-3.24) | 1.65<br>(1.31-2.07) | 1.34<br>(1.06-1.71) | 1.36<br>(1.04-1.77) | 1.19<br>(0.89-1.59) | 1.01<br>(0.67-1.51) | 0.99<br>(0.65-1.49) | 1.83<br>(1.01-3.32)  | 1.65<br>(0.92-2.96)  | 1.36<br>(0.96-1.93) | 1.38<br>(0.97-1.97) |
| Never                            | reference           |                     | reference           |                     | reference           |                     | reference           |                     | reference            |                      | reference           |                     |
| <b>Health Insurance</b>          |                     |                     |                     |                     |                     |                     |                     |                     |                      |                      |                     |                     |
| Yes                              | 0.82<br>(0.66-1.02) | 0.99<br>(0.79-1.26) | 1.19<br>(0.96-1.48) | 1.22<br>(0.97-1.53) | 0.98<br>(0.63-1.51) | 1.90<br>(1.16-3.09) | -                   | -                   | 2.88<br>(0.30-27.89) | 3.89<br>(0.30-49.91) | 0.47<br>(0.30-0.76) | 0.65<br>(0.41-1.04) |
| No                               | reference           |                     | reference           |                     | reference           |                     | reference           |                     | reference            |                      | reference           |                     |
| <b>Health Access<sup>c</sup></b> |                     |                     |                     |                     |                     |                     |                     |                     |                      |                      |                     |                     |
| Yes                              | 1.27<br>(0.94-1.73) | 1.34<br>(0.96-1.87) | 1.07<br>(0.80-1.43) | 1.15<br>(0.85-1.56) | 1.28<br>(0.66-2.47) | 1.62<br>(0.79-3.33) | 0.51<br>(0.18-1.48) | 0.55<br>(0.16-1.82) | 0.87<br>(0.34-2.21)  | 1.09<br>(0.46-2.55)  | 0.45<br>(0.16-1.31) | 0.72<br>(0.19-2.77) |
| No                               | reference           |                     | reference           |                     | reference           |                     | reference           |                     | reference            |                      | reference           |                     |
| <b>Location</b>                  |                     |                     |                     |                     |                     |                     |                     |                     |                      |                      |                     |                     |
| Urban                            | reference           |                     | reference           |                     | reference           |                     | reference           |                     | reference            |                      | reference           |                     |
| Rural                            | 1.34<br>(1.16-1.55) | 1.14<br>(0.96-1.36) | 1.59<br>(1.26-1.99) | 1.23<br>(0.95-1.58) | 1.14<br>(0.84-1.55) | 0.98<br>(0.71-1.37) | 1.01<br>(0.71-1.43) | 0.93<br>(0.64-1.36) | 0.93<br>(0.56-1.56)  | 0.90<br>(0.55-1.48)  | 0.98<br>(0.69-1.41) | 0.84<br>(0.59-1.21) |
| <b>Disability<sup>d</sup></b>    |                     |                     |                     |                     |                     |                     |                     |                     |                      |                      |                     |                     |
| None                             | reference           |                     | reference           |                     | reference           |                     | reference           |                     | reference            |                      | reference           |                     |
| Mild                             | 2.17<br>(1.82-2.58) | 1.44<br>(1.20-1.73) | 1.12<br>(0.76-1.66) | 0.99<br>(0.66-1.47) | 1.73<br>(1.05-2.87) | 1.50<br>(0.89-2.51) | 1.17<br>(0.68-2.01) | 1.05<br>(0.59-1.88) | 1.23<br>(0.73-2.06)  | 0.96<br>(0.59-1.58)  | 0.94<br>(0.59-1.48) | 0.87<br>(0.53-1.43) |
| Moderate                         | 3.19<br>(2.62-3.87) | 1.50<br>(1.21-1.86) | 2.36<br>(1.70-3.27) | 1.79<br>(1.27-2.52) | 2.12<br>(1.40-3.23) | 1.58<br>(1.03-2.44) | 1.72<br>(1.10-2.71) | 1.41<br>(0.88-2.25) | 1.44<br>(0.86-2.41)  | 0.92<br>(0.56-1.52)  | 1.24<br>(0.82-1.87) | 1.11<br>(0.71-1.73) |
| Severe                           | 7.16<br>(5.70-8.99) | 2.52<br>(1.94-3.27) | 4.37<br>(3.16-6.06) | 2.89<br>(2.03-4.13) | 3.66<br>(2.41-5.54) | 2.05<br>(1.33-3.18) | 2.72<br>(1.68-4.39) | 1.81<br>(1.08-3.04) | 2.28<br>(1.30-4.00)  | 1.12<br>(0.62-2.02)  | 2.40<br>(1.54-3.73) | 1.89<br>(1.18-3.01) |
| <b>Comorbidity<sup>e</sup></b>   |                     |                     |                     |                     |                     |                     |                     |                     |                      |                      |                     |                     |
| 0                                | reference           |                     | reference           |                     | reference           |                     | reference           |                     | reference            |                      | reference           |                     |
| 1                                | 1.48<br>(1.22-1.79) | 1.18<br>(0.97-1.45) | 1.07<br>(0.81-1.40) | 1.10<br>(0.83-1.46) | 1.14<br>(0.86-1.49) | 1.06<br>(0.80-1.40) | 0.85<br>(0.56-1.28) | 0.80<br>(0.51-1.25) | 1.56<br>(0.83-2.91)  | 1.13<br>(0.60-2.13)  | 1.49<br>(0.92-2.41) | 1.75<br>(1.05-2.93) |
| 2-8                              | 2.15<br>(1.78-2.60) | 1.34<br>(1.09-1.65) | 1.59<br>(1.20-2.10) | 1.52<br>(1.13-2.05) | 1.51<br>(1.17-1.96) | 1.30<br>(0.99-1.71) | 1.07<br>(0.71-1.60) | 1.05<br>(0.67-1.63) | 2.07<br>(1.18-3.61)  | 1.27<br>(0.72-2.25)  | 1.65<br>(1.05-2.93) | 2.00<br>(1.20-3.34) |
| <b>Memory<sup>f</sup></b>        |                     |                     |                     |                     |                     |                     |                     |                     |                      |                      |                     |                     |
| Poor                             | 3.72<br>(3.00-4.60) | 1.39<br>(1.10-1.75) | 2.37<br>(1.75-3.21) | 1.73<br>(1.26-2.38) | 2.84<br>(1.94-4.17) | 1.56<br>(1.02-2.37) | 3.28<br>(1.82-5.89) | 2.03<br>(1.06-3.87) | 2.64<br>(1.60-4.33)  | 1.38<br>(0.77-2.48)  | 1.60<br>(1.05-2.45) | 1.15<br>(0.72-1.82) |
| Fair                             | 1.64<br>(1.28-2.09) | 1.00<br>(0.78-1.30) | 1.38<br>(1.01-1.90) | 1.12<br>(0.81-1.56) | 1.78<br>(1.21-2.63) | 1.25<br>(0.83-1.88) | 2.01<br>(1.08-3.75) | 1.57<br>(0.81-3.07) | 1.26<br>(0.75-2.13)  | 0.86<br>(0.48-1.56)  | 0.93<br>(0.58-1.50) | 0.83<br>(0.49-1.40) |
| Good                             | 1.35<br>(1.06-1.73) | 1.06<br>(0.83-1.37) | 1.07<br>(0.77-1.50) | 1.00<br>(0.72-1.40) | 1.28<br>(0.86-1.92) | 1.05<br>(0.69-1.59) | 2.24<br>(1.15-4.37) | 2.03<br>(1.04-3.99) | 0.95<br>(0.56-1.61)  | 0.84<br>(0.49-1.45)  | 1.08<br>(0.68-1.73) | 1.10<br>(0.68-1.76) |
| Very Good                        | reference           |                     | reference           |                     | reference           |                     | reference           |                     | reference            |                      | reference           |                     |

|                                         |                     |                     |                     |                     |                     |                     |                     |                     |                     |                     |                     |                     |
|-----------------------------------------|---------------------|---------------------|---------------------|---------------------|---------------------|---------------------|---------------------|---------------------|---------------------|---------------------|---------------------|---------------------|
| <b>Married<sup>g</sup></b>              |                     |                     |                     |                     |                     |                     |                     |                     |                     |                     |                     |                     |
| Yes                                     | reference           |                     |
| No                                      | 2.83<br>(2.43-3.29) | 1.15<br>(0.97-1.37) | 1.25<br>(1.01-1.55) | 0.92<br>(0.74-1.15) | 1.88<br>(1.52-2.34) | 1.11<br>(0.88-1.40) | 1.20<br>(0.85-1.70) | 0.98<br>(0.68-1.42) | 0.95<br>(0.66-1.36) | 0.64<br>(0.43-0.95) | 1.44<br>(1.04-1.99) | 1.22<br>(0.86-1.74) |
| <b>Social Support<sup>h</sup></b>       |                     |                     |                     |                     |                     |                     |                     |                     |                     |                     |                     |                     |
| Low                                     | 1.29<br>(0.94-1.78) | 1.00<br>(0.71-1.42) | 1.57<br>(1.14-2.16) | 1.19<br>(0.85-1.66) | 1.16<br>(0.90-1.48) | 0.86<br>(0.67-1.11) | 1.22<br>(0.78-1.91) | 0.97<br>(0.60-1.56) | 0.69<br>(0.43-1.09) | 0.63<br>(0.40-0.99) | 1.06<br>(0.70-1.62) | 0.98<br>(0.62-1.56) |
| High                                    | reference           |                     |
| <b>Social Participation<sup>i</sup></b> |                     |                     |                     |                     |                     |                     |                     |                     |                     |                     |                     |                     |
| Low                                     | 3.60<br>(2.91-4.46) | 1.63<br>(1.28-2.09) | 2.09<br>(1.66-2.63) | 1.54<br>(1.20-2.00) | 1.83<br>(1.48-2.26) | 1.30<br>(1.04-1.63) | 1.66<br>(1.08-2.56) | 1.18<br>(0.74-1.89) | 1.30<br>(0.84-2.01) | 0.81<br>(0.51-1.28) | 1.73<br>(1.21-2.47) | 1.61<br>(1.10-2.36) |
| High                                    | reference           |                     |
| <b>Recent Eye Exam<sup>j</sup></b>      |                     |                     |                     |                     |                     |                     |                     |                     |                     |                     |                     |                     |
| Yes                                     | reference           |                     |
| No                                      | 1.20<br>(0.88-1.65) | 0.99<br>(0.70-1.40) | 0.72<br>(0.55-0.95) | 0.59<br>(0.44-0.79) | 1.22<br>(0.95-1.57) | 1.06<br>(0.80-1.40) | 1.05<br>(0.74-1.47) | 0.98<br>(0.69-1.38) | 1.23<br>(0.85-1.77) | 1.10<br>(0.76-1.60) | 1.01<br>(0.71-1.45) | 0.87<br>(0.60-1.26) |

VI: vision impairment; CI: confidence interval; UOR: unadjusted odds ratio; AOR: adjusted odds ratio.

- a) Adjusted odds ratios are adjusted for age, educational attainment and wealth
- b) Wealth index: modeled estimate of household assets and characteristics in each country divided into quintiles
- c) Health access: able to access healthcare when needed
- d) 12-item WHO Disability Assessment Schedule scores: <5%, None; 5-13%, Mild; >13-30%, Moderate; ≥30% Severe
- e) Number of comorbidities based on self-report and strongly suggestive symptoms
- f) Memory score based on number of words correctly recalled: 0-18, Poor; 19-22, Fair; 23-26, Good; ≥27 Very Good
- g) Married or cohabitating
- h) Social support scores: 0-1, Low; 2-4 High
- i) Social participation scores: 0-2 Low; 3-4, High
- j) Recent eye exam: within last two years

**eTable 2.** Odds of near vision impairment in low- and middle-income countries

|                                 | China               |                                | Ghana               |                     | India               |                     | Mexico              |                     | Russia              |                     | South Africa        |                     |
|---------------------------------|---------------------|--------------------------------|---------------------|---------------------|---------------------|---------------------|---------------------|---------------------|---------------------|---------------------|---------------------|---------------------|
|                                 | UOR,<br>(95% CI)    | AOR <sup>a</sup> ,<br>(95% CI) | UOR,<br>(95% CI)    | AOR,<br>(95% CI)    | UOR,<br>(95% CI)    | AOR,<br>(95% CI)    | UOR,<br>(95% CI)    | AOR,<br>(95% CI)    | UOR,<br>(95% CI)    | AOR,<br>(95% CI)    | UOR,<br>(95% CI)    | AOR,<br>(95% CI)    |
| <b>Age</b>                      |                     |                                |                     |                     |                     |                     |                     |                     |                     |                     |                     |                     |
| 50-59                           | reference           |                                | reference           |                     | reference           |                     | reference           |                     | reference           |                     | reference           |                     |
| 60-69                           | 1.85<br>(1.66-2.07) |                                | 1.34<br>(1.09-1.64) |                     | 1.20<br>(1.02-1.42) |                     | 0.97<br>(0.64-1.47) |                     | 1.06<br>(0.73-1.55) |                     | 1.39<br>(1.08-1.79) |                     |
| 70-79                           | 2.80<br>(2.48-3.16) |                                | 1.65<br>(1.34-2.03) |                     | 1.40<br>(1.10-1.79) |                     | 1.11<br>(0.71-1.75) |                     | 1.67<br>(1.13-2.48) |                     | 1.23<br>(0.89-1.70) |                     |
| 80+                             | 4.68<br>(3.79-5.78) |                                | 3.12<br>(2.39-4.06) |                     | 1.40<br>(0.99-1.98) |                     | 0.84<br>(0.52-1.38) |                     | 3.75<br>(2.35-5.99) |                     | 1.43<br>(0.89-2.28) |                     |
| <b>Sex</b>                      |                     |                                |                     |                     |                     |                     |                     |                     |                     |                     |                     |                     |
| Male                            | reference           |                                | reference           |                     | reference           |                     | reference           |                     | reference           |                     | reference           |                     |
| Female                          | 1.40<br>(1.28-1.52) | 1.20<br>(1.09-1.31)            | 1.48<br>(1.26-1.73) | 1.49<br>(1.26-1.75) | 1.51<br>(1.30-1.76) | 1.53<br>(1.29-1.81) | 1.23<br>(0.93-1.63) | 1.13<br>(0.85-1.51) | 0.90<br>(0.71-1.14) | 0.83<br>(0.65-1.05) | 1.12<br>(0.90-1.39) | 1.07<br>(0.84-1.35) |
| <b>Education</b>                |                     |                                |                     |                     |                     |                     |                     |                     |                     |                     |                     |                     |
| None                            | reference           |                                | reference           |                     | reference           |                     | reference           |                     | reference           |                     | reference           |                     |
| Primary School not completed    | 0.68<br>(0.60-0.77) |                                | 0.84<br>(0.62-1.13) |                     | 1.09<br>(0.84-1.42) |                     | 0.94<br>(0.66-1.34) |                     | 1.92<br>(0.40-9.14) |                     | 1.03<br>(0.74-1.42) |                     |
| Primary School                  | 0.50<br>(0.44-0.56) |                                | 0.75<br>(0.58-0.97) |                     | 0.95<br>(0.75-1.20) |                     | 0.76<br>(0.49-1.18) |                     | 1.99<br>(0.48-8.19) |                     | 0.85<br>(0.61-1.17) |                     |
| Secondary/ High School          | 0.31<br>(0.27-0.35) |                                | 0.66<br>(0.53-0.81) |                     | 0.74<br>(0.59-0.92) |                     | 0.70<br>(0.40-1.23) |                     | 1.27<br>(0.32-4.96) |                     | 0.74<br>(0.53-1.04) |                     |
| University or Post-Graduate     | 0.35<br>(0.28-0.46) |                                | 0.84<br>(0.52-1.35) |                     | 0.66<br>(0.47-0.93) |                     | 0.99<br>(0.56-1.74) |                     | 0.65<br>(0.16-2.69) |                     | 0.73<br>(0.40-1.31) |                     |
| <b>Wealth Index<sup>b</sup></b> |                     |                                |                     |                     |                     |                     |                     |                     |                     |                     |                     |                     |
| Lowest quintile                 | 1.75<br>(1.51-2.02) |                                | 1.29<br>(1.01-1.65) |                     | 1.08<br>(0.85-1.39) |                     | 1.41<br>(0.95-2.09) |                     | 1.53<br>(0.93-2.49) |                     | 0.91<br>(0.64-1.30) |                     |
| 2                               | 1.32<br>(1.14-1.53) |                                | 1.16<br>(0.90-1.50) |                     | 1.18<br>(0.93-1.50) |                     | 1.82<br>(1.19-2.79) |                     | 2.06<br>(1.31-3.23) |                     | 1.04<br>(0.73-1.49) |                     |
| 3                               | 1.12<br>(0.96-1.30) |                                | 1.22<br>(0.95-1.57) |                     | 1.11<br>(0.86-1.43) |                     | 1.45<br>(0.92-2.27) |                     | 1.90<br>(1.18-3.08) |                     | 1.01<br>(0.71-1.43) |                     |
| 4                               | 0.80<br>(0.69-0.93) |                                | 1.08<br>(0.84-1.40) |                     | 1.22<br>(0.96-1.54) |                     | 1.15<br>(0.74-1.80) |                     | 2.06<br>(1.22-3.48) |                     | 0.85<br>(0.58-1.23) |                     |
| Highest quintile                | reference           |                                | reference           |                     | reference           |                     | reference           |                     | reference           |                     | reference           |                     |
| <b>Food Insecurity</b>          |                     |                                |                     |                     |                     |                     |                     |                     |                     |                     |                     |                     |
| Ever                            | 1.39<br>(0.85-2.30) | 1.18<br>(0.72-1.95)            | 1.06<br>(0.89-1.25) | 0.99<br>(0.83-1.19) | 0.80<br>(0.64-0.99) | 0.76<br>(0.60-0.97) | 1.57<br>(1.10-2.25) | 1.52<br>(1.05-2.19) | 1.03<br>(0.66-1.62) | 1.02<br>(0.64-1.62) | 1.36<br>(1.05-1.76) | 1.43<br>(1.08-1.88) |
| Never                           | reference           |                                | reference           |                     | reference           |                     | reference           |                     | reference           |                     | reference           |                     |

|                                  |                     |                     |                     |                     |                     |                     |                     |                     |                     |                     |                     |                     |
|----------------------------------|---------------------|---------------------|---------------------|---------------------|---------------------|---------------------|---------------------|---------------------|---------------------|---------------------|---------------------|---------------------|
| <b>Health Insurance</b>          |                     |                     |                     |                     |                     |                     |                     |                     |                     |                     |                     |                     |
| Yes                              | 1.05<br>(0.90-1.22) | 1.17<br>(1.00-1.37) | 1.11<br>(0.94-1.30) | 1.04<br>(0.87-1.23) | 0.87<br>(0.62-1.23) | 1.01<br>(0.71-1.43) | -                   | -                   | 0.22<br>(0.07-0.68) | 0.27<br>(0.10-0.70) | 0.91<br>(0.69-1.21) | 1.00<br>(0.72-1.38) |
| No                               | reference           |                     |
| <b>Health Access<sup>c</sup></b> |                     |                     |                     |                     |                     |                     |                     |                     |                     |                     |                     |                     |
| Yes                              | 1.17<br>(0.95-1.43) | 1.17<br>(0.95-1.45) | 0.94<br>(0.76-1.17) | 0.94<br>(0.75-1.17) | 0.99<br>(0.55-1.79) | 1.04<br>(0.57-1.89) | 2.29<br>(0.76-6.90) | 2.14 (0.70-6.58)    | 0.76<br>(0.34-1.71) | 0.83<br>(0.39-1.77) | 1.06<br>(0.42-2.67) | 0.71<br>(0.26-1.95) |
| No                               | reference           |                     |
| <b>Location</b>                  |                     |                     |                     |                     |                     |                     |                     |                     |                     |                     |                     |                     |
| Urban                            | reference           |                     |
| Rural                            | 1.58<br>(1.44-1.73) | 1.55<br>(1.38-1.73) | 1.14<br>(0.97-1.35) | 1.05<br>(0.88-1.26) | 0.94<br>(0.75-1.17) | 0.88<br>(0.69-1.13) | 1.05<br>(0.80-1.39) | 1.02<br>(0.76-1.36) | 0.73<br>(0.46-1.17) | 0.71<br>(0.46-1.09) | 1.05<br>(0.83-1.33) | 1.05<br>(0.80-1.37) |
| <b>Disability<sup>d</sup></b>    |                     |                     |                     |                     |                     |                     |                     |                     |                     |                     |                     |                     |
| None                             | reference           |                     |
| Mild                             | 1.57<br>(1.41-1.76) | 1.28<br>(1.14-1.44) | 1.34<br>(1.03-1.74) | 1.28<br>(0.98-1.67) | 0.99<br>(0.73-1.35) | 0.95<br>(0.69-1.30) | 1.11<br>(0.74-1.66) | 1.07<br>(0.72-1.60) | 1.18<br>(0.79-1.76) | 0.99<br>(0.67-1.46) | 1.23<br>(0.89-1.70) | 1.14<br>(0.82-1.58) |
| Moderate                         | 2.07<br>(1.81-2.38) | 1.41<br>(1.22-1.62) | 1.72<br>(1.37-2.16) | 1.52<br>(1.20-1.92) | 1.22<br>(0.92-1.61) | 1.12<br>(0.83-1.50) | 0.92<br>(0.65-1.30) | 0.88<br>(0.62-1.24) | 1.42<br>(0.93-2.17) | 1.09<br>(0.72-1.64) | 1.56<br>(1.16-2.09) | 1.52<br>(1.11-2.09) |
| Severe                           | 3.31<br>(2.70-4.05) | 1.86<br>(1.49-2.33) | 2.68<br>(2.13-3.38) | 2.13<br>(1.66-2.73) | 1.52<br>(1.14-2.03) | 1.34<br>(0.98-1.83) | 0.93<br>(0.64-1.36) | 0.83<br>(0.56-1.24) | 2.13<br>(1.33-3.42) | 1.33<br>(0.83-2.14) | 1.51<br>(1.10-2.08) | 1.42<br>(1.01-2.01) |
| <b>Comorbidity<sup>e</sup></b>   |                     |                     |                     |                     |                     |                     |                     |                     |                     |                     |                     |                     |
| 0                                | reference           |                     |
| 1                                | 1.35<br>(1.21-1.52) | 1.21<br>(1.08-1.37) | 1.22<br>(0.99-1.49) | 1.21<br>(0.98-1.49) | 0.98<br>(0.81-1.19) | 0.96<br>(0.79-1.17) | 0.82<br>(0.58-1.17) | 0.74<br>(0.52-1.05) | 1.64<br>(0.98-2.74) | 1.34<br>(0.82-2.19) | 1.11<br>(0.79-1.55) | 1.15<br>(0.83-1.61) |
| 2-8                              | 1.85<br>(1.64-2.08) | 1.46<br>(1.28-1.65) | 1.80<br>(1.46-2.21) | 1.69<br>(1.37-2.08) | 1.06<br>(0.87-1.28) | 1.00<br>(0.82-1.21) | 0.82<br>(0.58-1.17) | 0.74<br>(0.52-1.05) | 2.40<br>(1.54-3.72) | 1.70<br>(1.12-2.57) | 1.42<br>(1.01-2.00) | 1.42<br>(1.02-2.00) |
| <b>Memory<sup>f</sup></b>        |                     |                     |                     |                     |                     |                     |                     |                     |                     |                     |                     |                     |
| Poor                             | 2.25<br>(1.99-2.55) | 1.30<br>(1.13-1.50) | 2.60<br>(2.05-3.28) | 2.16<br>(1.69-2.76) | 1.33<br>(1.04-1.71) | 1.14<br>(0.87-1.49) | 0.78<br>(0.48-1.28) | 0.77<br>(0.46-1.31) | 3.57<br>(2.34-5.46) | 2.70<br>(1.74-4.19) | 1.40<br>(1.03-1.91) | 1.37<br>(0.98-1.92) |
| Fair                             | 1.37<br>(1.20-1.57) | 1.03<br>(0.90-1.19) | 1.96<br>(1.53-2.50) | 1.77<br>(1.38-2.26) | 1.44<br>(1.12-1.86) | 1.30<br>(1.00-1.69) | 0.68<br>(0.40-1.17) | 0.67<br>(0.38-1.18) | 1.62<br>(1.05-2.50) | 1.43<br>(0.94-2.16) | 0.77<br>(0.56-1.05) | 0.83<br>(0.60-1.16) |
| Good                             | 1.10<br>(0.96-1.26) | 0.97<br>(0.84-1.11) | 1.29<br>(1.01-1.66) | 1.24<br>(0.96-1.59) | 1.14<br>(0.89-1.46) | 1.07<br>(0.84-1.37) | 0.60<br>(0.35-1.03) | 0.62<br>(0.35-1.08) | 1.52<br>(0.97-2.36) | 1.45<br>(0.93-2.27) | 0.93<br>(0.69-1.25) | 0.91<br>(0.67-1.23) |
| Very Good                        | reference           |                     |
| <b>Married<sup>g</sup></b>       |                     |                     |                     |                     |                     |                     |                     |                     |                     |                     |                     |                     |
| Yes                              | reference           |                     |
| No                               | 1.74<br>(1.55-1.96) | 1.08 (0.95-1.23)    | 1.41 (1.20-1.65)    | 1.23<br>(1.04-1.46) | 1.14 (0.95-1.37)    | 1.00<br>(0.83-1.21) | 0.85 (0.63-1.15)    | 0.82<br>(0.60-1.10) | 1.01<br>(0.75-1.37) | 0.76<br>(0.56-1.04) | 1.10<br>(0.88-1.39) | 1.10<br>(0.87-1.41) |

|                                         |                     |                     |                     |                     |                     |                     |                     |                     |                     |                     |                     |                     |
|-----------------------------------------|---------------------|---------------------|---------------------|---------------------|---------------------|---------------------|---------------------|---------------------|---------------------|---------------------|---------------------|---------------------|
| <b>Social Support<sup>h</sup></b>       |                     |                     |                     |                     |                     |                     |                     |                     |                     |                     |                     |                     |
| Low                                     | 1.00<br>(0.83-1.20) | 0.90<br>(0.73-1.09) | 1.34<br>(1.03-1.74) | 1.21<br>(0.93-1.58) | 1.14<br>(0.96-1.35) | 1.07<br>(0.90-1.27) | 0.84<br>(0.57-1.26) | 0.82<br>(0.54-1.24) | 1.05<br>(0.72-1.54) | 0.99<br>(0.67-1.46) | 1.21<br>(0.87-1.69) | 1.17<br>(0.82-1.66) |
| High                                    | reference           |
| <b>Social Participation<sup>i</sup></b> |                     |                     |                     |                     |                     |                     |                     |                     |                     |                     |                     |                     |
| Low                                     | 2.18<br>(1.80-2.63) | 1.38<br>(1.13-1.68) | 1.40<br>(1.17-1.67) | 1.13<br>(0.93-1.36) | 1.42<br>(1.20-1.68) | 1.33<br>(1.12-1.58) | 1.20<br>(0.81-1.77) | 1.12<br>(0.76-1.64) | 1.21<br>(0.81-1.81) | 0.83<br>(0.57-1.23) | 1.30<br>(0.98-1.73) | 1.28<br>(0.95-1.72) |
| High                                    | reference           |
| <b>Recent Eye Exam<sup>j</sup></b>      |                     |                     |                     |                     |                     |                     |                     |                     |                     |                     |                     |                     |
| Yes                                     | reference           |
| No                                      | 1.11<br>(0.91-1.35) | 0.93<br>(0.76-1.15) | 0.91<br>(0.73-1.13) | 0.90<br>(0.72-1.12) | 0.93<br>(0.76-1.14) | 0.88<br>(0.72-1.09) | 1.70<br>(1.29-2.24) | 1.73<br>(1.32-2.27) | 1.24<br>(0.92-1.67) | 1.15<br>(0.85-1.55) | 1.07<br>(0.81-1.40) | 1.14<br>(0.86-1.53) |

VI: vision impairment; CI: confidence interval; UOR: unadjusted odds ratio; AOR: adjusted odds ratio.

- a) Adjusted odds ratios are adjusted for age, educational attainment and wealth
- b) Wealth index: modeled estimate of household assets and characteristics in each country divided into quintiles
- c) Health access: able to access healthcare when needed
- d) 12-item WHO Disability Assessment Schedule scores: <5%, None; 5-13%, Mild; >13-30%, Moderate; ≥30% Severe
- e) Number of comorbidities based on self-report and strongly suggestive symptoms
- f) Memory score based on number of words correctly recalled: 0-18, Poor; 19-22, Fair; 23-26, Good; ≥27 Very Good
- g) Married or cohabitating
- h) Social support scores: 0-1, Low; 2-4, High
- i) Social participation scores: 0-2 Low; 3-4, High
- j) Recent eye exam: within last two years

**eTable 3.** Odds of having had a recent eye exam in low- and middle-income countries

|                                 | China               |                                | Ghana               |                     | India               |                     | Mexico              |                     | Russia              |                     | South Africa         |                     |
|---------------------------------|---------------------|--------------------------------|---------------------|---------------------|---------------------|---------------------|---------------------|---------------------|---------------------|---------------------|----------------------|---------------------|
|                                 | UOR,<br>(95% CI)    | AOR <sup>a</sup> ,<br>(95% CI) | UOR,<br>(95% CI)    | AOR,<br>(95% CI)    | UOR,<br>(95% CI)    | AOR,<br>(95% CI)    | UOR,<br>(95% CI)    | AOR,<br>(95% CI)    | UOR,<br>(95% CI)    | AOR,<br>(95% CI)    | UOR,<br>(95% CI)     | AOR,<br>(95% CI)    |
| <b>Age</b>                      |                     |                                |                     |                     |                     |                     |                     |                     |                     |                     |                      |                     |
| 50-59                           | reference           |                                | reference           |                     | reference           |                     | reference           |                     | reference           |                     | reference            |                     |
| 60-69                           | 1.10<br>(0.88-1.38) |                                | 1.06<br>(0.84-1.35) |                     | 1.10<br>(0.90-1.34) |                     | 1.01<br>(0.69-1.50) |                     | 0.66<br>(0.46-0.95) |                     | 1.05<br>(0.79-1.39)  |                     |
| 70-79                           | 1.25<br>(0.98-1.42) |                                | 1.33<br>(1.04-1.70) |                     | 1.09<br>(0.81-1.45) |                     | 0.86<br>(0.57-1.32) |                     | 0.57<br>(0.37-0.89) |                     | 1.46<br>(1.03-2.06)  |                     |
| 80+                             | 0.66<br>(0.42-1.04) |                                | 1.30<br>(0.92-1.85) |                     | 0.78<br>(0.50-1.21) |                     | 0.72<br>(0.44-1.18) |                     | 0.40<br>(0.25-0.65) |                     | 0.85<br>(0.53-1.36)  |                     |
| <b>Sex</b>                      |                     |                                |                     |                     |                     |                     |                     |                     |                     |                     |                      |                     |
| Male                            | reference           |                                | reference           |                     | reference           |                     | reference           |                     | reference           |                     | reference            |                     |
| Female                          | 1.10<br>(0.92-1.31) | 1.37<br>(1.14-1.65)            | 0.90<br>(0.74-1.08) | 1.20<br>(0.97-1.48) | 0.89<br>(0.74-1.06) | 1.30<br>(1.06-1.60) | 1.38<br>(1.06-1.80) | 1.45<br>(1.11-1.89) | 1.14<br>(0.81-1.61) | 1.28<br>(0.95-1.73) | 0.68<br>(0.54-0.86)  | 0.79<br>(0.61-1.04) |
| <b>Education</b>                |                     |                                |                     |                     |                     |                     |                     |                     |                     |                     |                      |                     |
| None                            | reference           |                                | reference           |                     | reference           |                     | reference           |                     | reference           |                     | reference            |                     |
| Primary School not completed    | 1.31<br>(0.95-1.80) |                                | 0.82<br>(0.56-1.20) |                     | 1.34<br>(1.01-1.79) |                     | 1.23<br>(0.86-1.75) |                     | 0.67<br>(0.18-2.53) |                     | 1.74<br>(1.16-2.61)  |                     |
| Primary School                  | 1.85<br>(1.39-2.47) |                                | 1.28<br>(0.93-1.76) |                     | 1.55<br>(1.17-2.05) |                     | 1.52<br>(1.02-2.29) |                     | 0.58<br>(0.19-1.75) |                     | 1.71<br>(1.16-2.53)  |                     |
| Secondary/High School           | 2.55<br>(1.97-3.29) |                                | 2.15<br>(1.71-2.71) |                     | 2.19<br>(1.71-2.81) |                     | 1.13<br>(0.60-2.11) |                     | 1.04<br>(0.35-3.09) |                     | 3.61<br>(2.47-5.29)  |                     |
| University or Post-Graduate     | 5.63<br>(3.43-9.24) |                                | 5.70<br>(3.81-8.52) |                     | 4.82<br>(3.34-6.95) |                     | 3.09<br>(1.84-5.18) |                     | 1.15<br>(0.37-3.56) |                     | 8.13<br>(4.44-14.88) |                     |
| <b>Wealth Index<sup>b</sup></b> |                     |                                |                     |                     |                     |                     |                     |                     |                     |                     |                      |                     |
| Lowest quintile                 | 0.27<br>(0.20-0.35) |                                | 0.17<br>(0.12-0.24) |                     | 0.36<br>(0.27-0.50) |                     | 0.55<br>(0.35-0.86) |                     | 0.55<br>(0.35-0.85) |                     | 0.14<br>(0.09-0.20)  |                     |
| 2                               | 0.45<br>(0.34-0.60) |                                | 0.31<br>(0.23-0.42) |                     | 0.48<br>(0.36-0.65) |                     | 0.62<br>(0.39-0.97) |                     | 0.67<br>(0.44-1.03) |                     | 0.35<br>(0.24-0.50)  |                     |
| 3                               | 0.69<br>(0.52-0.91) |                                | 0.37<br>(0.28-0.50) |                     | 0.52<br>(0.38-0.70) |                     | 0.71<br>(0.44-1.16) |                     | 0.75<br>(0.47-1.19) |                     | 0.24<br>(0.17-0.36)  |                     |
| 4                               | 0.72<br>(0.54-0.96) |                                | 0.46<br>(0.35-0.60) |                     | 0.65<br>(0.50-0.84) |                     | 1.01<br>(0.64-1.59) |                     | 0.99<br>(0.59-1.64) |                     | 0.52<br>(0.36-0.77)  |                     |
| Highest quintile                | reference           |                                | reference           |                     | reference           |                     | reference           |                     | reference           |                     | reference            |                     |
| <b>Food Insecurity</b>          |                     |                                |                     |                     |                     |                     |                     |                     |                     |                     |                      |                     |
| Ever                            | 0.95<br>(0.31-2.94) | 1.28<br>(0.44-3.74)            | 0.72<br>(0.58-0.90) | 1.14<br>(0.89-1.45) | 0.47<br>(0.36-0.63) | 0.63<br>(0.46-0.84) | 0.55<br>(0.40-0.76) | 0.61<br>(0.44-0.85) | 1.23<br>(0.55-2.74) | 1.27<br>(0.65-2.48) | 0.40<br>(0.30-0.55)  | 0.62<br>(0.44-0.88) |
| Never                           | reference           |                                | reference           |                     | reference           |                     | reference           |                     | reference           |                     | reference            |                     |



|                                  |                     |                     |                     |                     |                     |                     |                     |                     |                      |                      |                     |                     |
|----------------------------------|---------------------|---------------------|---------------------|---------------------|---------------------|---------------------|---------------------|---------------------|----------------------|----------------------|---------------------|---------------------|
| <b>Health Insurance</b>          |                     |                     |                     |                     |                     |                     |                     |                     |                      |                      |                     |                     |
| Yes                              | 1.28<br>(0.99-1.65) | 1.10<br>(0.85-1.42) | 2.09<br>(1.72-2.53) | 1.57<br>(1.27-1.95) | 2.88<br>(2.01-4.14) | 1.74<br>(1.18-2.56) | -                   | -                   | 1.94<br>(0.35-10.70) | 1.91<br>(0.27-13.42) | 2.39<br>(1.80-3.19) | 1.77<br>(1.27-2.46) |
| No                               | reference           |                     | reference           |                     | reference           |                     | -                   |                     | reference            |                      | reference           |                     |
| <b>Health Access<sup>c</sup></b> |                     |                     |                     |                     |                     |                     |                     |                     |                      |                      |                     |                     |
| Yes                              | 0.95<br>(0.63-1.42) | 0.94<br>(0.62-1.41) | 1.73<br>(1.27-2.36) | 1.53<br>(1.12-2.09) | 0.97<br>(0.49-1.92) | 0.84<br>(0.42-1.70) | 0.87<br>(0.34-2.27) | 0.80<br>(0.31-2.05) | 0.36<br>(0.07-1.86)  | 0.40<br>(0.09-1.78)  | 0.76<br>(0.23-2.49) | 0.93<br>(0.25-3.45) |
| No                               | reference           |                     | reference           |                     | reference           |                     | reference           |                     | reference            |                      | reference           |                     |
| <b>Location</b>                  |                     |                     |                     |                     |                     |                     |                     |                     |                      |                      |                     |                     |
| Urban                            | reference           |                     | reference           |                     | reference           |                     | reference           |                     | reference            |                      | reference           |                     |
| Rural                            | 0.30<br>(0.24-0.37) | 0.43<br>(0.34-0.54) | 0.44<br>(0.37-0.54) | 0.68<br>(0.54-0.84) | 0.57<br>(0.45-0.72) | 0.74<br>(0.58-0.95) | 0.58<br>(0.44-0.76) | 0.63<br>(0.47-0.84) | 0.75<br>(0.47-1.19)  | 0.70<br>(0.46-1.06)  | 0.44<br>(0.34-0.58) | 0.69<br>(0.50-0.94) |
| <b>Disability<sup>d</sup></b>    |                     |                     |                     |                     |                     |                     |                     |                     |                      |                      |                     |                     |
| None                             | reference           |                     | reference           |                     | reference           |                     | reference           |                     | reference            |                      | reference           |                     |
| Mild                             | 1.17<br>(0.94-1.47) | 1.46<br>(1.15-1.86) | 0.97<br>(0.72-1.31) | 1.12<br>(0.82-1.52) | 0.86<br>(0.63-1.18) | 1.01<br>(0.72-1.40) | 1.14<br>(0.78-1.67) | 1.37<br>(0.94-2.00) | 2.00<br>(1.34-2.99)  | 2.17<br>(1.46-3.21)  | 0.64<br>(0.45-0.91) | 0.58<br>(0.41-0.83) |
| Moderate                         | 1.20<br>(0.90-1.59) | 1.86<br>(1.36-2.56) | 1.16<br>(0.89-1.50) | 1.45<br>(1.09-1.92) | 0.77<br>(0.58-1.03) | 1.08<br>(0.80-1.45) | 1.30<br>(0.92-1.85) | 1.63<br>(1.13-2.33) | 1.46<br>(1.02-2.08)  | 1.95<br>(1.32-2.87)  | 0.66<br>(0.48-0.92) | 0.74<br>(0.53-1.05) |
| Severe                           | 0.56<br>(0.35-0.90) | 0.94<br>(0.56-1.57) | 1.15<br>(0.88-1.51) | 1.52<br>(1.11-2.08) | 0.80<br>(0.60-1.07) | 1.30<br>(0.95-1.78) | 1.13<br>(0.77-1.64) | 1.53<br>(1.02-2.30) | 0.86<br>(0.57-1.28)  | 1.49<br>(0.93-2.37)  | 0.47<br>(0.33-0.67) | 0.61<br>(0.41-0.91) |
| <b>Comorbidity<sup>e</sup></b>   |                     |                     |                     |                     |                     |                     |                     |                     |                      |                      |                     |                     |
| 0                                | reference           |                     | reference           |                     | reference           |                     | reference           |                     | reference            |                      | reference           |                     |
| 1                                | 1.10<br>(0.88-1.39) | 1.09<br>(0.86-1.39) | 1.21<br>(0.94-1.55) | 1.04<br>(0.80-1.34) | 1.19<br>(0.95-1.51) | 1.17<br>(0.92-1.49) | 1.86<br>(1.33-2.60) | 1.90<br>(1.36-2.65) | 1.06<br>(0.68-1.65)  | 1.29<br>(0.82-2.01)  | 0.85<br>(0.60-1.21) | 0.75<br>(0.51-1.09) |
| 2-8                              | 1.56<br>(1.23-1.99) | 1.55<br>(1.20-1.99) | 1.39<br>(1.08-1.79) | 1.23<br>(0.94-1.60) | 1.33<br>(1.05-1.68) | 1.38<br>(1.09-1.74) | 2.28<br>(1.66-3.14) | 2.38<br>(1.74-3.27) | 1.72<br>(1.13-2.64)  | 2.48<br>(1.58-3.91)  | 1.01<br>(0.71-1.42) | 0.94<br>(0.64-1.40) |
| <b>Memory<sup>f</sup></b>        |                     |                     |                     |                     |                     |                     |                     |                     |                      |                      |                     |                     |
| Poor                             | 0.54<br>(0.42-0.69) | 0.74<br>(0.56-0.98) | 0.99<br>(0.75-1.30) | 1.11<br>(0.82-1.49) | 0.45<br>(0.35-0.60) | 0.66<br>(0.50-0.88) | 1.06<br>(0.67-1.68) | 1.31<br>(0.82-2.10) | 0.47<br>(0.32-0.69)  | 0.67<br>(0.44-1.01)  | 0.61<br>(0.43-0.86) | 0.97<br>(0.65-1.46) |
| Fair                             | 0.76<br>(0.59-0.98) | 0.86<br>(0.66-1.12) | 1.00<br>(0.76-1.32) | 1.13<br>(0.84-1.52) | 0.57<br>(0.43-0.75) | 0.74<br>(0.56-0.99) | 1.68<br>(1.05-2.67) | 1.91<br>(1.18-3.09) | 0.57<br>(0.38-0.86)  | 0.72<br>(0.48-1.09)  | 0.62<br>(0.44-0.88) | 1.04<br>(0.68-1.58) |
| Good                             | 0.78<br>(0.60-1.02) | 0.84<br>(0.64-1.10) | 1.12<br>(0.85-1.47) | 1.19<br>(0.89-1.58) | 0.61<br>(0.46-0.81) | 0.67<br>(0.50-0.90) | 1.83<br>(1.11-3.04) | 1.91<br>(1.16-3.16) | 0.74<br>(0.51-1.09)  | 0.82<br>(0.56-1.20)  | 0.53<br>(0.38-0.75) | 0.77<br>(0.52-1.12) |
| Very Good                        | reference           |                     | reference           |                     | reference           |                     | reference           |                     | reference            |                      | reference           |                     |
| <b>Married<sup>g</sup></b>       |                     |                     |                     |                     |                     |                     |                     |                     |                      |                      |                     |                     |
| Yes                              | reference           |                     | reference           |                     | reference           |                     | reference           |                     | reference            |                      | reference           |                     |
| No                               | 0.78<br>(0.61-0.98) | 1.06<br>(0.82-1.38) | 0.88<br>(0.73-1.06) | 1.09<br>(0.88-1.35) | 0.83<br>(0.67-1.03) | 1.04<br>(0.83-1.31) | 1.13<br>(0.85-1.49) | 1.23<br>(0.92-1.64) | 0.90<br>(0.67-1.21)  | 1.17<br>(0.87-1.58)  | 0.56<br>(0.43-0.72) | 0.72<br>(0.54-0.95) |

|                                         |                     |                     |                     |                     |                     |                     |                     |                     |                     |                     |                     |                     |
|-----------------------------------------|---------------------|---------------------|---------------------|---------------------|---------------------|---------------------|---------------------|---------------------|---------------------|---------------------|---------------------|---------------------|
| <b>Social Support<sup>h</sup></b>       |                     |                     |                     |                     |                     |                     |                     |                     |                     |                     |                     |                     |
| Low                                     | 0.63<br>(0.45-0.89) | 0.72<br>(0.51-1.03) | 0.84<br>(0.60-1.16) | 1.01<br>(0.71-1.44) | 0.77<br>(0.63-0.95) | 0.90<br>(0.72-1.11) | 1.24<br>(0.88-1.76) | 1.27<br>(0.90-1.80) | 0.83<br>(0.59-1.17) | 0.88<br>(0.63-1.23) | 0.89<br>(0.60-1.31) | 0.98<br>(0.63-1.51) |
| High                                    | reference           |                     |
| <b>Social Participation<sup>i</sup></b> |                     |                     |                     |                     |                     |                     |                     |                     |                     |                     |                     |                     |
| Low                                     | 0.64<br>(0.42-0.98) | 0.84<br>(0.54-1.32) | 1.28<br>(1.03-1.58) | 1.44<br>(1.13-1.84) | 0.86<br>(0.71-1.04) | 1.06<br>(0.87-1.29) | 0.74<br>(0.53-1.05) | 0.82<br>(0.58-1.17) | 0.52<br>(0.37-0.74) | 0.70<br>(0.49-0.99) | 0.79<br>(0.57-1.08) | 0.99<br>(0.70-1.39) |
| High                                    | reference           |                     |
| <b>Vision Impairment<sup>j</sup></b>    |                     |                     |                     |                     |                     |                     |                     |                     |                     |                     |                     |                     |
| No VI                                   | reference           |                     |
| Mild VI                                 | 0.81<br>(0.66-1.00) | 0.87<br>(0.70-1.09) | 1.20<br>(0.96-1.52) | 1.12<br>(0.88-1.43) | 0.97<br>(0.77-1.22) | 1.03<br>(0.82-1.29) | 0.78<br>(0.56-1.08) | 0.72<br>(0.52-0.99) | 0.81<br>(0.57-1.16) | 0.89<br>(0.63-1.25) | 0.80<br>(0.61-1.05) | 0.79<br>(0.58-1.07) |
| Moderate VI                             | 0.74<br>(0.55-1.00) | 0.89<br>(0.63-1.25) | 1.52<br>(1.06-2.18) | 1.60<br>(1.09-2.35) | 0.95<br>(0.74-1.23) | 1.09<br>(0.83-1.43) | 0.81<br>(0.56-1.16) | 0.81<br>(0.57-1.17) | 0.79<br>(0.53-1.18) | 0.90<br>(0.61-1.33) | 0.91<br>(0.60-1.37) | 0.90<br>(0.61-1.33) |
| Severe VI or Blindness                  | 0.63<br>(0.37-1.07) | 0.90<br>(0.51-1.59) | 1.32<br>(0.94-1.85) | 1.67<br>(1.16-2.38) | 0.80<br>(0.53-1.21) | 1.04<br>(0.67-1.60) | 0.65<br>(0.30-1.42) | 0.78<br>(0.35-1.72) | 0.61<br>(0.33-1.13) | 0.74<br>(0.39-1.41) | 1.20<br>(0.67-2.15) | 1.52<br>(0.79-2.95) |

VI: vision impairment; CI: confidence interval; UOR: unadjusted odds ratio; AOR: adjusted odds ratio.

- a) Adjusted odds ratios are adjusted for age, educational attainment and wealth
- b) Wealth index: modeled estimate of household assets and characteristics in each country divided into quintiles
- c) Health access: able to access healthcare when needed
- d) 12-item WHO Disability Assessment Schedule scores: <5%, None; 5-13%, Mild; >13-30%, Moderate; ≥30% Severe
- e) Number of comorbidities based on self-report and strongly suggestive symptoms
- f) Memory score based on number of words correctly recalled: 0-18, Poor; 19-22, Fair; 23-26, Good; ≥27 Very Good
- g) Married or cohabitating
- h) Social support scores: 0-1, Low; 2-4 High
- i) Social participation scores: 0-2 Low; 3-4, High
- j) Mild vision impairment: <6/12 and ≥6/18; moderate vision impairment: <6/18 and ≥6/60; severe vision impairment: <6/60 and ≥3/60; blindness: <3/60
